# Supplementary material
Source: PubMed Central journal article supplement (PMC3057116)
Supplement: NIHMS269179-supplement-supl_1.pdf [file NIHMS269179-supplement-supl_1.pdf]

## Online Supplementary

### MATERIALS AND METHODS

**The growth of *S. aureus* in a bacterial co-culture.** To investigate whether the growth of *S. aureus* was influenced by *P. acnes*, *S. aureus* ( $1 \times 10^7$  CFU), *P. acnes* ( $1 \times 10^7$  CFU) or a co-culture of *P. acnes* and *S. aureus* (1:1 ratio with a total of  $2 \times 10^7$  CFU) in 5  $\mu$ l PBS were spotted on a Brucella broth agar plate and cultured under anaerobic conditions at 37°C for 2 days, respectively. All bacteria were collected and diluted 1:10<sup>2</sup>-1:10<sup>6</sup> with sterile PBS. For CFU counts, the diluted bacteria (5  $\mu$ l) was subsequently spotted on a 3% TSB agar plate and cultured under anaerobic conditions at 37°C for 2 days. *P. acnes* did not grow in a TSB agar plate. Thus, bacterial colonies derived from a co-culture of *P. acnes* and *S. aureus* reflect the growth of *S. aureus*. No differences in CFUs between *S. aureus* and a co-culture of *P. acnes* and *S. aureus* suggest that *P. acnes* did not influence the growth of *S. aureus*.

**The effect of anti-CAMP factor antiserum on *S. aureus*-induced skin lesions.** *S. aureus* ( $1 \times 10^7$  CFU in 50  $\mu$ l PBS) was pre-incubated with 5% (v/v) anti-CAMP factor antiserum at 25 °C for 1 h. Dorsal skins of ICR mice were injected subcutaneously with *S. aureus* ( $1 \times 10^7$  CFU in 50  $\mu$ l PBS) or

Huang CM *S. aureus* hijacks *P. acnes* to intensify its virulence

antiserum-treated *S. aureus* ( $1 \times 10^7$  CFU in 50  $\mu$ l PBS). Lesion sizes were examined two days after injection. Skin lesions of were measured and compiled statistics as described in MATERIALS AND METHODS.

**TABLE S1. The sequenced peptides of *S. aureus*  $\beta$ -hemolysin via NanoLC-LTQ MS/MS.**

| Number | Peptide sequences               | Amino acid |
|--------|---------------------------------|------------|
| 1      | KDDTDLKLVSHNVYMLSTVLYPNWGQYK    | 38-65      |
| 2      | DDTDLKLVSHNVYMLSTVLYPNWGQYK     | 39-65      |
| 3      | LVSHNVYMLSTVLYPNWGQYK           | 45-65      |
| 4      | RADLIGQSSYIKNNDVVIFNEAFDNGASDK  | 66-95      |
| 5      | ADLIGQSSYIK                     | 67-77      |
| 6      | ADLIGQSSYIKNNDVVIFNEAFDNGASDK   | 67-95      |
| 7      | NNDVVIFNEAFDNGASDK              | 78-95      |
| 8      | EYPYQTPVLGR                     | 103-113    |
| 9      | SQSGWDKTEGSYSSTVAEDGGVAIVSK     | 114-140    |
| 10     | SQSGWDKTEGSYSSTVAEDGGVAIVSKYPIK | 114-144    |
| 11     | TEGSYSSTVAEDGGVAIVSK            | 121-140    |
| 12     | TEGSYSSTVAEDGGVAIVSKYPIK        | 121-144    |
| 13     | IEKNGKNVHVIGTHTQSEDSR           | 170-190    |
| 14     | NVHVIGTHTQSEDSR                 | 176-190    |
| 15     | NVHVIGTHTQSEDSRRCGAGHDRK        | 176-198    |
| 16     | EISDFVK                         | 206-212    |
| 17     | NIPKDETVYIGGDLNVNK              | 215-232    |
| 18     | NIPKDETVYIGGDLNVNKGTPFEK        | 215-238    |
| 19     | DETVYIGGDLNVNK                  | 219-232    |
| 20     | NLNVNDVLYAGHNSTWDPQSNSIAK       | 243-267    |
| 21     | YNYPNGKPEHLDYIFTDK              | 268-285    |
| 22     | YNYPNGKPEHLDYIFTDKDHK           | 268-288    |
| 23     | PEHLDYIFTDK                     | 275-285    |
| 24     | QLVNEVVTEK                      | 292-301    |
| 25     | QLVNEVVTEKPK                    | 292-303    |
| 26     | PKPWDVYAFPYYYVYNDVDFSDHYPIK     | 302-326    |
| 27     | PWDVYAFPYYYVYNDVDFSDHYPIK       | 304-326    |

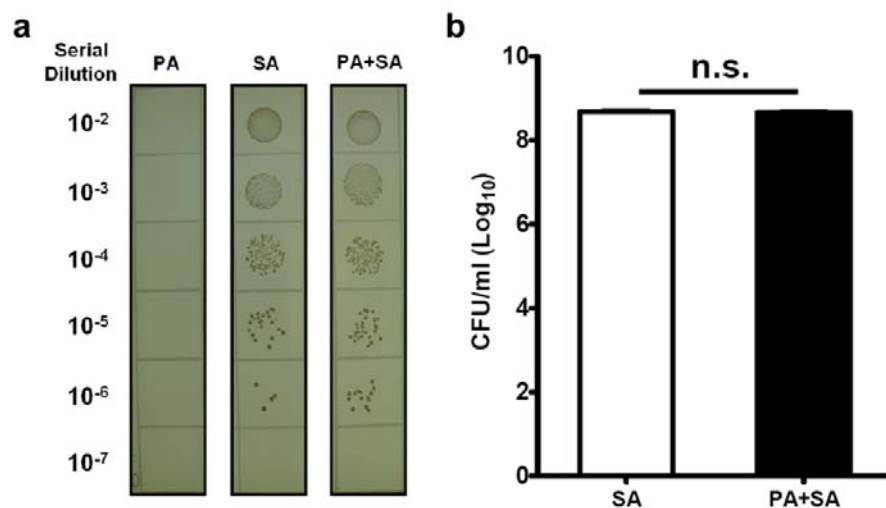

**Figure s1**

**Figure S1. Co-culture of *P. acnes* with *S. aureus* does not influence the growth of *S. aureus*.** (a) Bacteria [*P. acnes* (PA), *S. aureus* (SA) or the mixture of *P. acnes* and *S. aureus* (PA+SA)] grown on a Brucella broth agar were collected and diluted 1:10<sup>2</sup>-1:10<sup>6</sup> with sterile PBS. The diluted bacteria (5  $\mu$ l) were then spotted on a 3% TSB agar plate and cultured under anaerobic conditions at 37°C for 2 days. *P. acnes* did not grow on a 3% TSB agar plate, indicating that the bacterial colonies on agar plates exclusively derived from *S. aureus*. (b) No significant differences between the CFU counts of *S. aureus* (SA) grown alone or with *P. acnes* (PA+SA). The “n.s.” denotes not significant (n=6 via Student’s *t*-test).

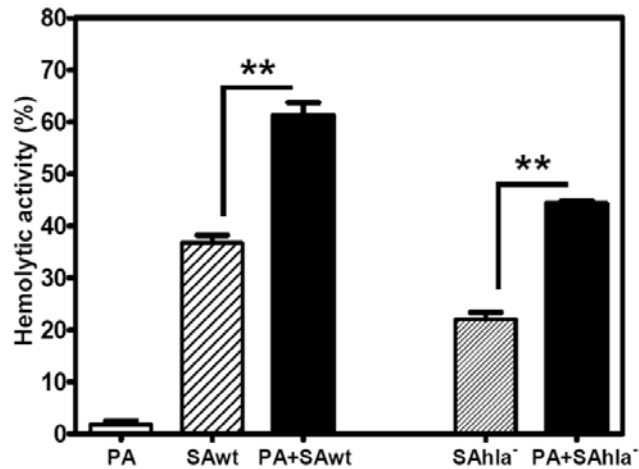

**Figure s2**

**Figure S2.** The  $\alpha$ -hemolysin deficiency does not completely abolish the enhancement of hemolysis caused by the co-culture of *P. acnes* and *S. aureus*. Bacteria ( $2 \times 10^7$  CFU) [*P. acnes* (PA), wild-type *S. aureus* (SAwt),  $\alpha$ -hemolysin deficient *S. aureus* (SAhla<sup>-</sup>)] alone or *P. acnes* plus wild-type *S. aureus* (PA+SAwt) or  $\alpha$ -hemolysin deficient *S. aureus* (PA+SAhla<sup>-</sup>) in 1:1 ratio with a total of  $2 \times 10^7$  CFU were incubated with sheep blood cells at 37°C with end-over-end rotation for two days. Hemolytic activity was detected by measuring the absorbance of hemoglobin release was measured at 540 nm. Data are the mean  $\pm$  SE (n=3, P< 0.005\*\* by Student's *t*-test).

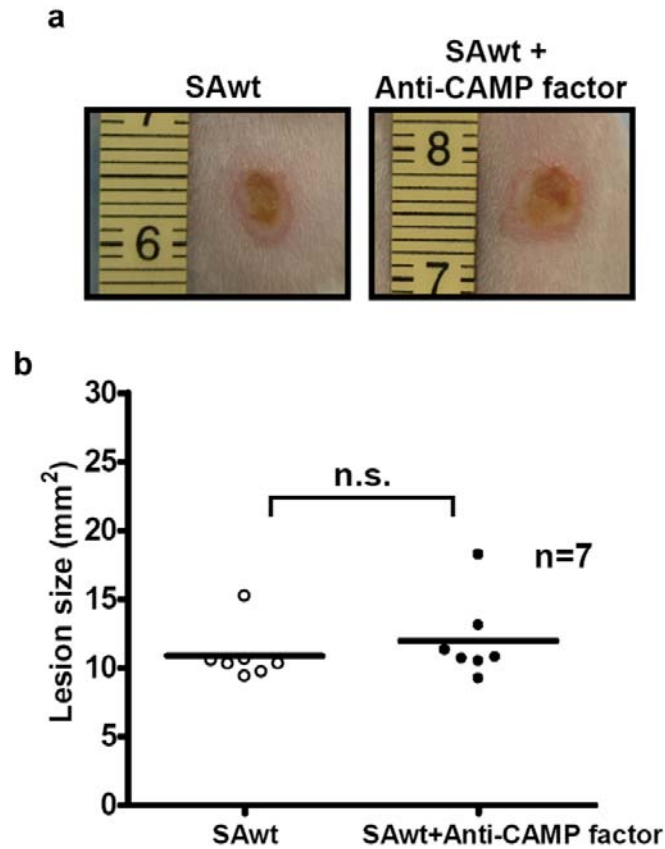

Figure S3

**Figure S3. The anti-CAMP factor antiserum does not block the skin lesions induced by *S. aureus*.** Wild-type *S. aureus* ( $1 \times 10^7$  CFU in 50  $\mu$ l PBS) bacteria were incubated with or without 5% (v/v) anti-CAMP factor antiserum at 25 °C for 1 h. After incubation, the mixture of bacteria and antiserum were injected subcutaneously into the dorsal skins of ICR mice for two days. Skin lesions were measured as described in the legends of Figs. 4 and 6a. Representative photographs of dorsal skin lesions are shown. Data are means of two independent experiments (n=7). The “n.s.” denotes not significant after Student’s *t*-test analysis.
